# Supplementary material for: Caveolin-1 Y14 phosphorylation suppresses tumor growth while promoting invasion
Source: PubMed Central journal article supplement (PMC6877104; doi:10.18632/oncotarget.27313), 2019-11-19
Supplement: oncotarget-10-6668-s001.pdf [file oncotarget-10-6668-s001.pdf]

# Caveolin-1 Y14 phosphorylation suppresses tumor growth while promoting invasion

## SUPPLEMENTARY MATERIALS

### Supplementary Table 1: The Cav1-dependent MDA-MB-435 pseudopod proteome

| Description                                                                                         | 435 overexpressing Cav PS vs 435 WT Cav PS |       |            |
|-----------------------------------------------------------------------------------------------------|--------------------------------------------|-------|------------|
|                                                                                                     | Ratio                                      | StDev | # peptides |
| empAI:0.17 Tax_Id=9606 Gene_Symbol=TCP1 T-complex protein 1 subunit alpha                           | 13.256                                     | 10.83 | 3          |
| empAI:0.57 Tax_Id=9606 Gene_Symbol=SFN Isoform 1 of 14-3-3 protein sigma                            | 12.776                                     | 8.56  | 2          |
| empAI:0.46 Tax_Id=9606 Gene_Symbol=HSP90AA1 Isoform 1 of Heat shock protein HSP 90-alpha            | 12.066                                     | 5.17  | 2          |
| empAI:0.36 Tax_Id=9606 Gene_Symbol=PARK7 Protein DJ-1                                               | 9.797                                      | 7.79  | 9          |
| empAI:0.88 Tax_Id=9606 Gene_Symbol=EEF1A1 Elongation factor 1-alpha                                 | 8.277                                      | 8.9   | 2          |
| empAI:0.46 Tax_Id=9606 Gene_Symbol=SOD1 Superoxide dismutase [Cu-Zn]                                | 8.219                                      | 6.22  | 6          |
| empAI:0.13 Tax_Id=9606 Gene_Symbol=ASS1 Argininosuccinate synthase                                  | 8.074                                      | 1.39  | 2          |
| empAI:0.41 Tax_Id=9606 Gene_Symbol=HSP90AB1 Heat shock protein HSP 90-beta                          | 7.81                                       | 1.21  | 2          |
| empAI:0.41 Tax_Id=9606 Gene_Symbol=LDHA Isoform 1 of L-lactate dehydrogenase A chain                | 6.117                                      | 6.62  | 2          |
| empAI:0.13 Tax_Id=9606 Gene_Symbol=LGALS3 Galectin-3                                                | 5.295                                      | 3.65  | 2          |
| empAI:0.98 Tax_Id=9606 Gene_Symbol=ACTB Actin, cytoplasmic 1                                        | 4.541                                      | 0.47  | 2          |
| empAI:0.17 Tax_Id=9606 Gene_Symbol=ALDOA Fructose-bisphosphate aldolase A                           | 4.482                                      | 7.71  | 6          |
| empAI:0.55 Tax_Id=9606 Gene_Symbol=PKM2 Isoform M2 of Pyruvate kinase isozymes M1/M2                | 4.455                                      | 5.08  | 8          |
| empAI:0.20 Tax_Id=9606 Gene_Symbol=HSPA8 Isoform 1 of Heat shock cognate 71 kDa protein             | 4.361                                      | 3.73  | 6          |
| empAI:1.20 Tax_Id=9606 Gene_Symbol=GAPDH Glyceraldehyde-3-phosphate dehydrogenase                   | 4.229                                      | 5.08  | 8          |
| empAI:0.31 Tax_Id=9606 Gene_Symbol=PSAT1 Isoform 2 of Phosphoserine aminotransferase                | 3.675                                      | 1.93  | 2          |
| empAI:0.21 Tax_Id=9606 Gene_Symbol=PPA1 Inorganic pyrophosphatase                                   | 3.652                                      | 1.59  | 4          |
| empAI:0.03 Tax_Id=9606 Gene_Symbol=IARS IARS protein                                                | 3.635                                      | 0.49  | 2          |
| empAI:0.05 Tax_Id=9606 Gene_Symbol=ACLY ATP-citrate synthase                                        | 3.618                                      | 2.46  | 3          |
| empAI:0.17 Tax_Id=9606 Gene_Symbol=CCT5 T-complex protein 1 subunit epsilon                         | 3.496                                      | 2.49  | 5          |
| empAI:0.28 Tax_Id=9606 Gene_Symbol=AHSA1 Activator of 90 kDa heat shock protein ATPase homolog 1    | 3.469                                      | 3.25  | 3          |
| empAI:0.15 Tax_Id=9606 Gene_Symbol=TKT Transketolase                                                | 3.456                                      | 0.04  | 3          |
| empAI:0.57 Tax_Id=9606 Gene_Symbol=ARF1 ADP-ribosylation factor                                     | 3.363                                      | 0.16  | 2          |
| empAI:0.11 Tax_Id=9606 Gene_Symbol=FASN Fatty acid synthase                                         | 3.275                                      | 1.09  | 3          |
| empAI:0.07 Tax_Id=9606 Gene_Symbol=FDPS Putative uncharacterized protein                            | 3.225                                      | 1.26  | 3          |
| empAI:0.97 Tax_Id=9606 Gene_Symbol=UBC;UBB;RPS27A ubiquitin and ribosomal protein S27a precursor    | 3.073                                      | 1     | 3          |
| empAI:0.07 Tax_Id=9606 Gene_Symbol=USP5 Isoform Long of Ubiquitin carboxyl-terminal hydrolase 5     | 2.716                                      | 0.64  | 2          |
| empAI:0.67 Tax_Id=9606 Gene_Symbol=TUBB Tubulin beta chain                                          | 2.631                                      | 0.15  | 2          |
| empAI:0.83 Tax_Id=9606 Gene_Symbol=ENO1 Isoform alpha-enolase of Alpha-enolase                      | 2.605                                      | 0.71  | 2          |
| empAI:0.36 Tax_Id=9606 Gene_Symbol=EIF5A Isoform 2 of Eukaryotic translation initiation factor 5A-1 | 2.57                                       | 1.9   | 2          |
| empAI:0.28 Tax_Id=9606 Gene_Symbol=HSP90B1 Endoplasmic                                              | 2.568                                      | 0.27  | 2          |
| empAI:0.06 Tax_Id=9606 Gene_Symbol=GANAB Isoform 2 of Neutral alpha-glucosidase AB                  | 2.535                                      | 1.87  | 7          |
| empAI:0.19 Tax_Id=9606 Gene_Symbol=UGDH UDP-glucose 6-dehydrogenase                                 | 2.419                                      | 0.49  | 2          |
| empAI:1.86 Tax_Id=9606 Gene_Symbol=GSTM3 Glutathione S-transferase Mu 3                             | 2.345                                      | 0.09  | 7          |

|                                                                                                                |       |      |    |
|----------------------------------------------------------------------------------------------------------------|-------|------|----|
| empAI:0.23 Tax_Id=9606 Gene_Symbol=EIF4A1 Eukaryotic initiation factor 4A-I                                    | 1.483 | 0.09 | 2  |
| empAI:0.32 Tax_Id=9606 Gene_Symbol=SGTA Small glutamine-rich tetratricopeptide repeat-containing protein alpha | 2.058 | 1.18 | 2  |
| empAI:0.12 Tax_Id=9606 Gene_Symbol=LAP3 Isoform 1 of Cytosol aminopeptidase                                    | 2.055 | 0.19 | 2  |
| empAI:0.07 Tax_Id=9606 Gene_Symbol=VCP Transitional endoplasmic reticulum ATPase                               | 2.028 | 0.61 | 3  |
| empAI:0.14 Tax_Id=9606 Gene_Symbol=PSMD11 Proteasome 26S non-ATPase subunit 11 variant (Fragment)              | 1.865 | 0.3  | 3  |
| empAI:3.93 Tax_Id=9606 Gene_Symbol=GSTP1 Glutathione S-transferase P                                           | 1.567 | 0.42 | 10 |
| empAI:0.10 Tax_Id=9606 Gene_Symbol=EZR Ezrin                                                                   | 1.328 | 0.57 | 2  |
| empAI:0.09 Tax_Id=9606 Gene_Symbol=STRAP Serine-threonine kinase receptor-associated protein                   | 1.285 | 0.59 | 8  |
| empAI:0.33 Tax_Id=9606 Gene_Symbol=TPT1 Tumor protein, translationally-controlled 1                            | 1.196 | 0.25 | 3  |
| empAI:0.20 Tax_Id=9606 Gene_Symbol=ARPC2 Actin-related protein 2/3 complex subunit 2                           | 1.189 | 0.23 | 2  |
| empAI:0.40 Tax_Id=9606 Gene_Symbol=ACTR3 Actin-related protein 3                                               | 1.098 | 0.78 | 4  |
| empAI:0.90 Tax_Id=9606 Gene_Symbol=RPLP0 60S acidic ribosomal protein P0                                       | 0.993 | 0.06 | 3  |
| empAI:0.25 Tax_Id=9606 Gene_Symbol=P4HB Protein disulfide-isomerase precursor                                  | 0.979 | 0.24 | 3  |
| empAI:0.19 Tax_Id=9606 Gene_Symbol=ANXA5 Annexin A5                                                            | 0.816 | 0.12 | 2  |
| empAI:0.22 Tax_Id=9606 Gene_Symbol=EEF1A1 Elongation factor 1-alpha                                            | 0.778 | 0.22 | 2  |
| empAI:0.19 Tax_Id=9606 Gene_Symbol=HSPA5 HSPA5 protein                                                         | 0.774 | 0.17 | 3  |
| empAI:0.06 Tax_Id=9606 Gene_Symbol=MAP4 Isoform 2 of Microtubule-associated protein                            | 0.729 | 0.14 | 2  |
| empAI:0.52 Tax_Id=9606 Gene_Symbol=PRDX5 Isoform Mitochondrial of Peroxiredoxin-5, mitochondrial precursor     | 0.724 | 0.12 | 2  |
| empAI:0.05 Tax_Id=9606 Gene_Symbol=TLN1 Talin-1                                                                | 0.684 | 0.31 | 3  |
| empAI:0.13 Tax_Id=9606 Gene_Symbol=MTHFD1 C-1-tetrahydrofolate synthase, cytoplasmic                           | 0.659 | 0.15 | 2  |
| empAI:0.46 Tax_Id=9606 Gene_Symbol=PRDX6 Peroxiredoxin-6                                                       | 0.661 | 0.34 | 2  |
| empAI:0.56 Tax_Id=9606 Gene_Symbol=CCT2 T-complex protein 1 subunit beta                                       | 0.654 | 0.24 | 7  |
| empAI:0.09 Tax_Id=9606 Gene_Symbol=MYH9 Myosin-9                                                               | 0.65  | 0.28 | 5  |
| empAI:0.31 Tax_Id=9606 Gene_Symbol=EEF2 Elongation factor 2                                                    | 0.639 | 0.31 | 5  |
| empAI:0.22 Tax_Id=9606 Gene_Symbol=GPI Glucose-6-phosphate isomerase                                           | 0.642 | 0.1  | 2  |
| empAI:1.77 Tax_Id=9606 Gene_Symbol=PPIA;PPIAL3;LOC654188 Peptidyl-prolyl cis-trans isomerase A                 | 0.607 | 0.24 | 3  |
| empAI:0.38 Tax_Id=9606 Gene_Symbol=YWHAE 14-3-3 protein epsilon                                                | 0.578 | 0.01 | 2  |
| empAI:1.24 Tax_Id=9606 Gene_Symbol=PFN1 Profilin-1                                                             | 0.581 | 0.13 | 3  |
| empAI:0.64 Tax_Id=9606 Gene_Symbol=CCT6A T-complex protein 1 subunit zeta                                      | 0.573 | 0.08 | 7  |
| empAI:0.08 Tax_Id=9606 Gene_Symbol=SERPINB1 Leukocyte elastase inhibitor                                       | 0.542 | 0.2  | 2  |
| empAI:0.56 Tax_Id=9606 Gene_Symbol=TUBB2C Tubulin beta-2C chain                                                | 0.508 | 0.3  | 2  |
| empAI:0.46 Tax_Id=9606 Gene_Symbol=TUBA1C Tubulin alpha-1C chain                                               | 0.475 | 0.12 | 5  |
| empAI:0.21 Tax_Id=9606 Gene_Symbol=PAICS Multifunctional protein ADE2                                          | 0.451 | 0.09 | 2  |
| empAI:0.29 Tax_Id=9606 Gene_Symbol=EEF1G Elongation factor 1-gamma                                             | 0.427 | 0.04 | 2  |
| empAI:0.52 Tax_Id=9606 Gene_Symbol=PRDX1 Peroxiredoxin-1                                                       | 0.395 | 0.01 | 2  |
| empAI:0.11 Tax_Id=9606 Gene_Symbol=DPYSL2 Dihydropyrimidinase-related protein 2                                | 0.384 | 0.05 | 2  |
| empAI:0.20 Tax_Id=9606 Gene_Symbol=CORO1A Coronin-1A                                                           | 0.381 | 0.18 | 3  |
| empAI:0.05 Tax_Id=9606 Gene_Symbol=CLTC Isoform 1 of Clathrin heavy chain 1                                    | 0.345 | 1.04 | 3  |

Complete list of proteins identified by quantitative mass spectroscopy showing enrichment in purified pseudopodia of Cav1 WT-expressing MDA-MB-435 cells relative to pseudopodia of control MDA-MB-435 cells. Data represent 3 independent experiments. 3/1: ratio of detected protein in pseudopodia of Cav1 WT vs control MDA-MB-435 cells; StDev: standard deviation over 3 experiments; # peptides: number of detected peptides that match the protein.
